# Supplementary material
Source: HighWire-hosted journal article supplement (https://www.cmaj.ca/highwire/filestream/59489/field_highwire_adjunct_files/1/150342-image-2-at.pdf)
Supplement: 150342-image-2-at.pdf [file 150342-image-2-at.pdf]

Appendix 2: Magnetic resonance image of the brain showing increased  $T_2$ -weighted fluid-attenuated inversion recovery (FLAIR) signal in the posterior occipital lobe (white arrows) bilaterally in a gyral pattern suggestive of encephalitis.

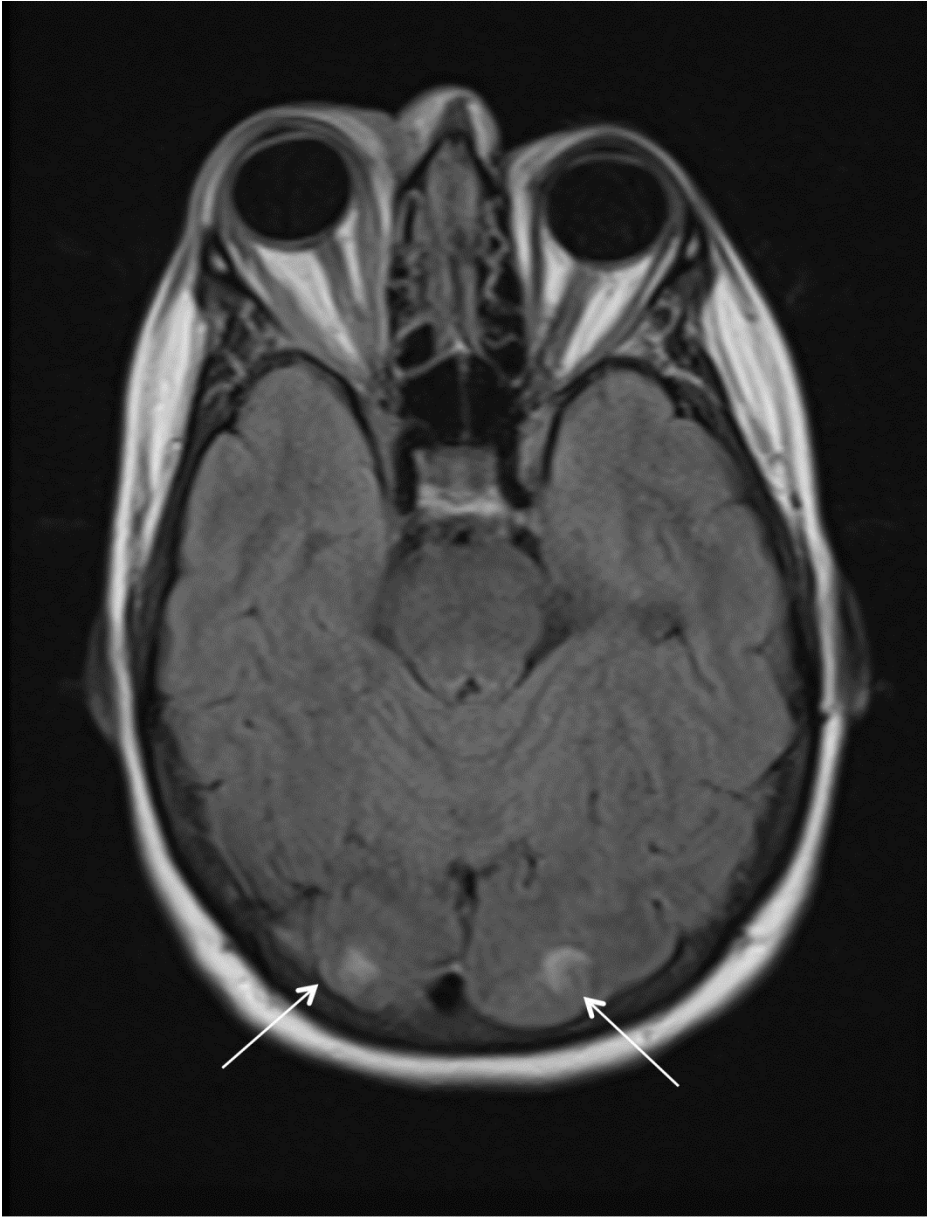

Appendix to: Jain S, Khara R. Herpes zoster ophthalmicus complicated by encephalitis.

CMAJ 2015. DOI: 10.1503/cmaj.150342.

Copyright © 2016 The Author(s) or their employer(s).

To receive this resource in an accessible format, please contact us at  
cmajgroup@cmaj.ca.
